# Supplementary material for: Diversity of Mycobiota in Spanish Grape Berries and Selection of Hanseniaspora uvarum U1 to Prevent Mycotoxin Contamination
Source: Toxins (Basel). 2021 Sep 13;13(9):649. doi: 10.3390/toxins13090649 (PMC8473298; doi:10.3390/toxins13090649)
Supplement: Supplementary file 1 [file toxins-13-00649-s001.zip › toxins-1316971 supplementary.pdf]

# Supplementary Materials: Diversity of Mycobiota in Spanish Grape Berries and Selection of *Hanseniaspora uvarum* U1 to Prevent Mycotoxin Contamination

Carolina Gómez-Albarrán, Clara Melguizo, Belén Patiño, Covadonga Vázquez and Jéssica Gil-Serna

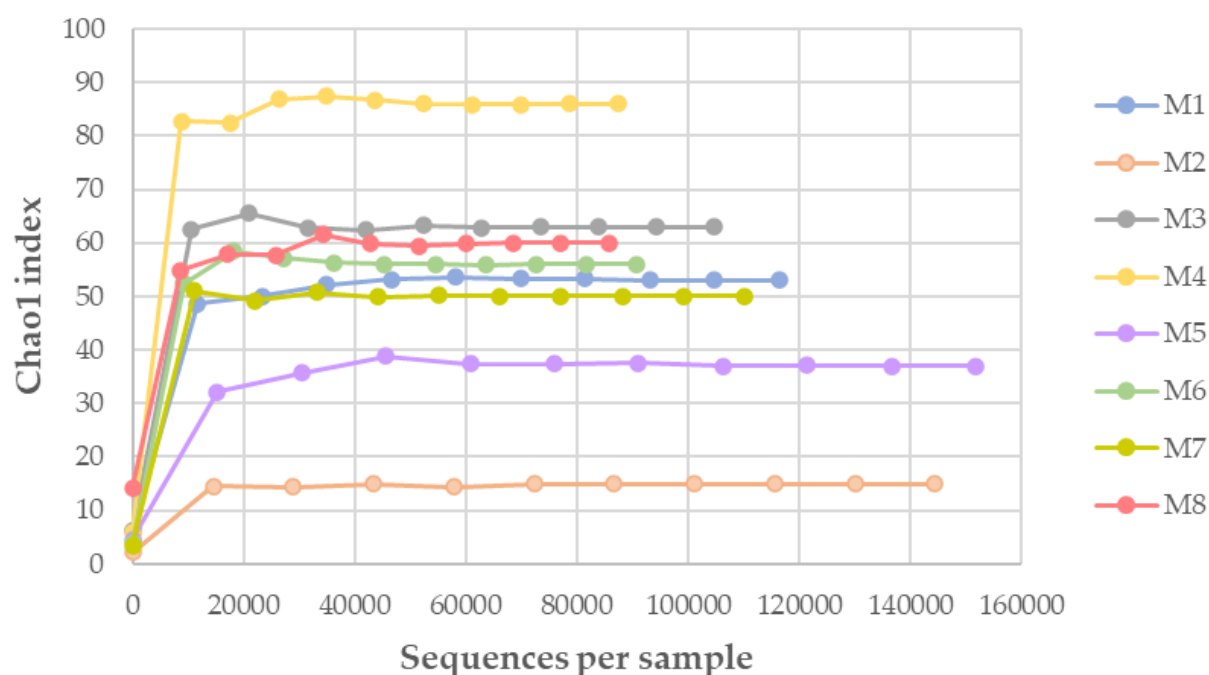

**Figure S1.** Rarefaction curves. Chao1 index is plotted against the sequences obtained on each sample.

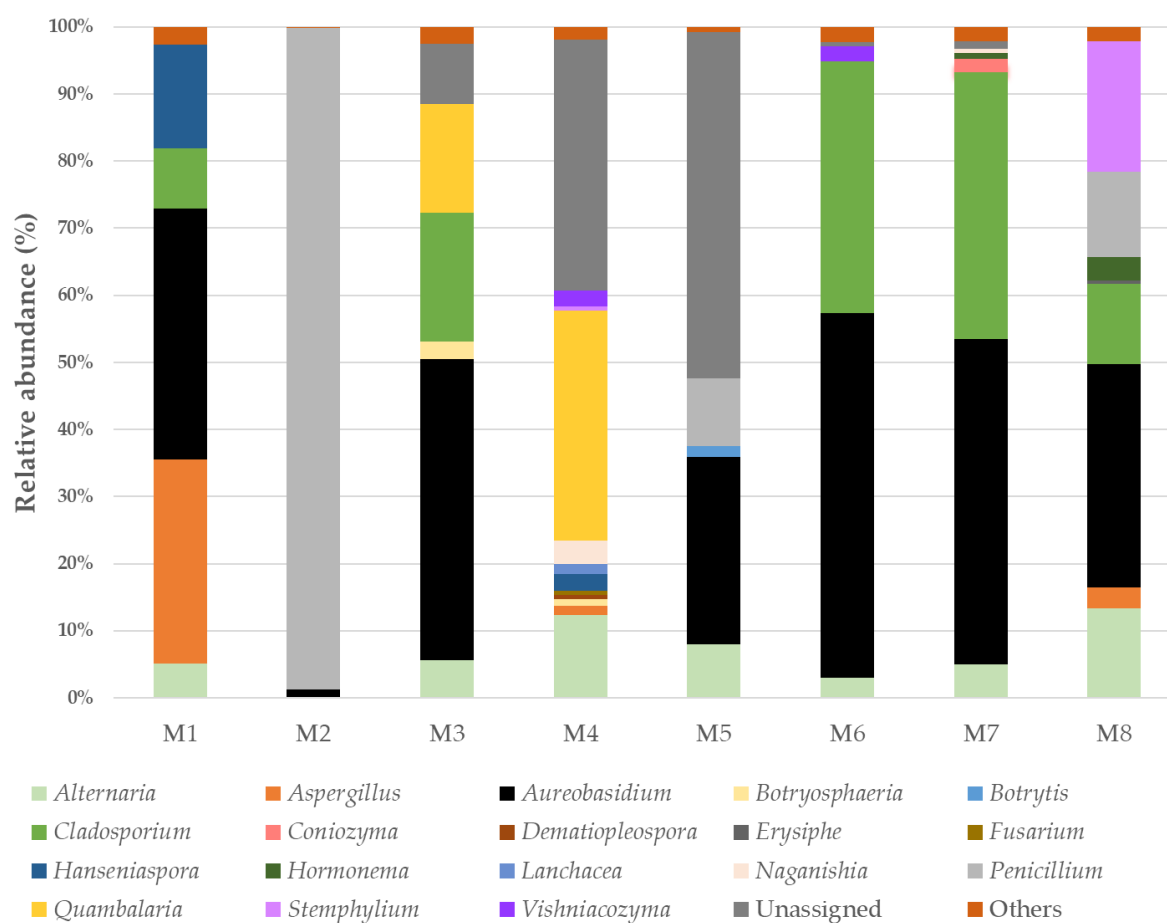

**Figure S2.** Relative abundance of the main fungal genera in grape samples, based on the metagenomic analysis of ITS2 sequences. Only the taxa with a taxonomic attribution at the level of genus which appear at least with abundance higher than 0.5% are included. The rest genera are grouped as “Others”.

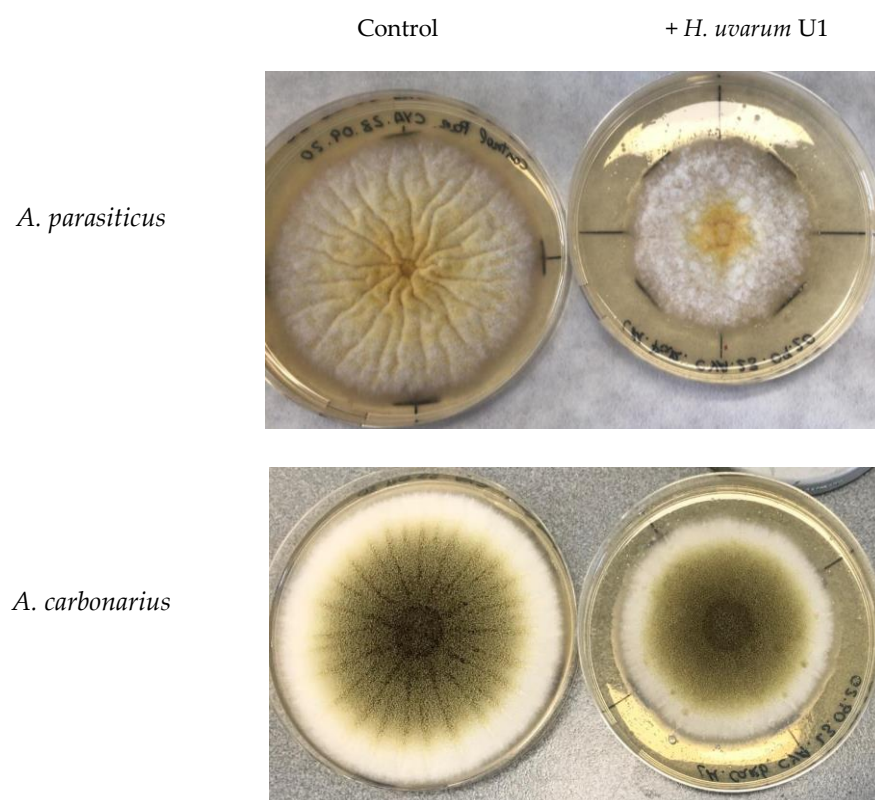

**Figure S3.** Colony growth of *A. parasiticus* (above) and *A. carbonarius* (below) on control plates and when incubated in the presence of *H. uvarum* U1.
